# Supplementary material
Source: MDPI journal article supplement (https://www.mdpi.com/2073-4395/12/5/1202)
Supplement: s1 [file s1]

Archive with 2 entries (2 files):
- agronomy-1684063-Figure S1.pdf
- agronomy-1684063-Table S1.pdf
